# Epidemiology of Venous Thromboembolism in SARS- CoV-2 Infected Patients: A Systematic Review and Meta- Analysis

Running Head: VTE in COVID-19 Patients

Souvik Maitra<sup>1</sup>, Dalim K Baidya<sup>1</sup>, Sulagna Bhattacharjee<sup>1</sup>, Rahul K Anand<sup>1</sup>, Bikash R Ray<sup>1</sup>

<sup>1</sup> Department of Anaesthesiology, Pain Medicine & Critical Care, All India Institute of Medical Sciences, New Delhi

Correspondence to:

Dr. Sulagna Bhattacharjee MD, DNB, DM

Assistant Professor,

Room No: 5011, Teaching Block

Department of Anaesthesiology, Pain Medicine & Critical Care,

All India Institute of Medical Sciences,

Ansari Nagar, New Delhi- 110029

Email id: [bhattacharjee.sulagna85@gmail.com](mailto:bhattacharjee.sulagna85@gmail.com)

Telephone: +91- 11- 26593212

Key words: Hypercoagulability, SARS- CoV-2, COVID, COVID-19, VTE, PE, venous thromboembolism, DVT, deep venous thrombosis, pulmonary embolism

Source of support: Nil

Conflict of interests: None

## **Key Messages**

- This meta-analysis of observational studies was designed to know worldwide prevalence of thromboembolic events in COVID-19 patients.
- Data of more than 5000 patients from 19 observational studies were analyzed in this meta-analysis.
- Incidence of venous thromboembolism may be as high as 36% in these patients.

## **Abstract**

Early reports from China and Europe indicated that incidence of venous thromboembolism in COVID-19 patients may be high. In this meta-analysis of observational studies was designed to know worldwide prevalence of thromboembolic events in COVID-19 patients. Primary outcome of our review was to assess the proportion of patients with VTE. Secondary outcomes were to assess the proportion of patients' with DVT and proportion of patients with PE. Random effect meta-analysis model with restricted maximum likelihood estimator was used for all analysis. Pooled proportion with 95% confidence interval (95% CI) and heterogeneity ( $I^2$ ) was reported for all outcomes. Data of 5426 patients from n=19 articles were included in this systematic review and meta-analysis. Incidence of VTE (95% CI), PE (95% CI) and DVT (95% CI) was 23 (10- 36) %, 12 (6- 17) % and 15 (8- 23) %. We have found a high but incidence of thromboembolic events in COVID-19 patients. Further well-designed studies are required in this area to identify true incidence and risk factors of it.

## **Introduction**

Since the diagnosis of first confirmed case of SARS- CoV-2 infection in December 2019, more than 15,000,000 people have been affected and more than 600,000 people have died from it [1]. SARS- CoV-2 infection is associated with a hypercoagulable state possibly due to endothelial dysfunction secondary to the infection [2]. Early reports from China and Europe indicated that incidence of venous thromboembolism in these patients may be high [3, 4]; however, whether there is a difference between COVID-19 and non- COVID-19 patients is controversial [5]. However, most of the individual studies reporting incidence of thrombotic event were of small sample size and interpretation of individual study results difficult. Moreover, there is wide variability in the reported incidence of thromboembolic event in the individual studies. So, this meta-analysis of observational studies was designed to know worldwide prevalence of thromboembolic events in COVID-19 patients.

## **Methodology**

This systematic review and meta-analysis were conducted as per PRISMA methodology [6]. All peer-reviewed published studies, including RCTs, prospective cohort studies and retrospective studies, where incidence of lower limb venous thromboembolism was reported in SARS- CoV-2 infected adult patients were included in this systemic review and meta-analysis. Non- peer reviewed article, case reports, case series of less than 10 sample size and studies conducted in pediatric patients were excluded from this review.

Eligible articles for this systematic review and meta-analysis were searched from PubMed and PubMed central with the key words “venous thromboembolism and SARS-CoV-2”, “venous thromboembolism and COVID”, “venous thromboembolism and COVID-19”, “venous thromboembolism and coronavirus”, “VTE and COVID-19”, “VTE and SARS-CoV-2”, “VTE and coronavirus”, “VTE and COVID”, “pulmonary embolism and SARS-CoV-2”, “pulmonary embolism and COVID”, “pulmonary embolism and COVID-19”,

“pulmonary embolism and coronavirus”, “PE and SARS-CoV-2”, “PE and COVID”, “PE and COVID-19”, “PE and coronavirus”, “DVT and SARS-CoV-2”, “DVT and COVID”, “DVT and COVID-19”, “DVT and coronavirus”, “deep venous thrombosis and SARS-CoV-2”, “deep venous thrombosis and COVID”, “deep venous thrombosis and COVID-19”, “deep venous thrombosis and coronavirus”, from inception to 26<sup>th</sup> July 2020.

Required data from the eligible studies were extracted by two independent authors from the and then all data were tabulated in a predefined Microsoft Excel™ (Microsoft Corp., Redmond, WA) data sheet. All data were cross-checked by the third review author (SM). Risk of bias in individual studies were assessed by two independent authors (SM & SB) as per ‘Risk of Bias in Non-randomized Studies of Interventions’ methodology.

Primary outcome of our review was to assess the proportion of patients with VTE. Secondary outcomes were to assess the proportion of patients’ with DVT and proportion of patients with PE. Random effect meta-analysis model with restricted maximum likelihood estimator was used for all analysis. Pooled proportion with 95% confidence interval (95% CI) and heterogeneity ( $I^2$ ) was reported for all outcomes. All analyses were performed with *metafor* package in R (R version 3.6.1, R Development Core Team, 2010; R Foundation for Statistical Computing, Vienna, Austria) in *Jamovi* platform. Association between outcome of interests (incidence of VTE/ PE) and demographic and clinical characteristics of the patients were planned by mixed effect linear meta-regression model if more than 10 studies were available for analysis. Standardize regression coefficient with standard error (SE) and unadjusted  $R^2$  (amount of the heterogeneity accounted for that particular model) for each model were also estimated.

## **Results**

Initial database searching revealed 2259 articles and another 12 articles were retrieved from other sources. After duplicate removal 287 articles were screened from title and abstract.

Finally, data of 5426 patients from n=19 articles were included in this systematic review and meta-analysis [2- 5, 7- 21]. Two studies were conducted in China [4, 16], three were in United States [13, 20, 21], and rest were conducted in Europe [2, 3, 5, 7- 12, 14, 15, 17- 19]. Only five studies were prospective in design [2, 3, 5, 10, 15] and rest 13 were retrospective. Routine DVT screening was performed only in 3 studies [15, 19, 20] and screening on the basis of clinical symptoms were incorporated in rest of the studies. Thromboprophylaxis protocol was described in 13 studies, no thromboprophylaxis was used in one study [4] and 4 studies [2, 5, 12, 13] didn't describe thromboprophylaxis protocol. All included studies were high risk of biases because of variable thromboprophylaxis protocol, screening protocol, follow-up duration and obvious selection bias. Details of the included studies reported in table 1.

Incidence of VTE was reported in 10 studies and pooled estimate (95% CI) was 23 (10- 36) %; however significant heterogeneity ( $I^2=98.8\%$ ,  $p<0.001$ ) and publication bias ( $p=0.001$ , regression test for funnel plot asymmetry) were found. Fourteen studies reported incidence of PE and pooled estimate (95% CI) was 12 (6- 17) % and significant heterogeneity ( $I^2=99.3\%$ ,  $p<0.001$ ) and publication bias ( $p<0.001$ , regression test for funnel plot asymmetry) was reported. Pooled estimate (95% CI) of DVT was 15 (8- 23) % and it was reported in 16 studies. Significant heterogeneity ( $I^2=98.8\%$ ,  $p<0.001$ ) and publication bias ( $p<0.0001$ , regression test for funnel plot asymmetry) were also found in this outcome also. Neither mean age of the recruited patients nor proportion of patients mechanically ventilated at baseline was significant moderator of any of the above-mentioned clinical outcomes. Male sex was significantly associated with development of PE [effect estimate (SE) 0.007 (0.003),  $R^2=29.6\%$ ,  $p=0.02$ ].

## **Discussion**

In this meta-analysis we have found an overall high incidence of VTE, PE and DVT in COVID-19 patients across various disease severity and male sex was possibly associated with development of PE in these patients. Previous reports suggested that VTE related events in acutely ill medical patients is around 2 per 100 patients even with thromboprophylaxis [22]. Another multicentric study reported that 7.7% critically ill medical- surgical patients developed venous thromboembolism despite pharmacological thromboprophylaxis [23].

True incidence of thromboembolic events in COVID-19 patients is expected to be even higher as routine DVT/ PE screening at serial interval was not used in most of the studies. Secondly, significant numbers of patients were still in the hospital at the time publication of the study. Various thromboprophylaxis regimen was used in different studies which could have also impacted incidence of thromboembolic event. We have found significant amount of heterogeneity in all pooled thromboembolic events which could be due to ethnic variation of patients, variable screening protocol and thromboprophylaxis protocol, disease severity and patients' comorbid illness etc.

To conclude, we have found a high but incidence of thromboembolic events in COVID-19 patients. Further well-designed studies are required in this area to identify true incidence and risk factors of it.

## Reference

1. Coronavirus disease (COVID-2019) situation reports.  
[<https://www.who.int/emergencies/diseases/novel-coronavirus-2019/situation-reports>]. Accessed on 24<sup>th</sup> July 2020.
2. Spiezia L, Boscolo A, Poletto F, et al. COVID-19-Related Severe Hypercoagulability in Patients Admitted to Intensive Care Unit for Acute Respiratory Failure. *Thromb Haemost.* 2020;120(6):998-1000.

3. Klok FA, Kruip MJHA, van der Meer NJM, et al. Incidence of thrombotic complications in critically ill ICU patients with COVID-19. *Thromb Res.* 2020;191:145-147.
4. Cui S, Chen S, Li X, Liu S, Wang F. Prevalence of venous thromboembolism in patients with severe novel coronavirus pneumonia. *J Thromb Haemost.* 2020;18(6):1421-1424.
5. Rieder M, Goller I, Jeserich M, et al. Rate of venous thromboembolism in a prospective all-comers cohort with COVID-19 [published online ahead of print, 2020 Jul 2]. *J Thromb Thrombolysis.* 2020;1-9.
6. Liberati A, Altman DG, Tetzlaff J, et al. The PRISMA statement for reporting systematic reviews and meta-analyses of studies that evaluate healthcare interventions: explanation and elaboration. *BMJ.* 2009;339:b2700.
7. Longchamp A, Longchamp J, Manzocchi-Besson S, et al. Venous thromboembolism in critically ill patients with COVID-19: Results of a screening study for deep vein thrombosis. *Res Pract Thromb Haemost.* 2020;4(5):842-847.
8. Marone EM, Bonalumi G, Curci R, et al. Characteristics of venous thromboembolism in COVID-19 patients: a multicenter experience from Northern Italy [published online ahead of print, 2020 Jul 13]. *Ann Vasc Surg.* 2020;S0890-5096(20)30598-7.
9. Middeldorp S, Coppens M, van Haaps TF, et al. Incidence of venous thromboembolism in hospitalized patients with COVID-19 [published online ahead of print, 2020 May 5]. *J Thromb Haemost.* 2020.
10. Helms J, Tacquard C, Severac F, et al. High risk of thrombosis in patients with severe SARS-CoV-2 infection: a multicenter prospective cohort study. *Intensive Care Med.* 2020;46(6):1089-1098.
11. Thomas W, Varley J, Johnston A, et al. Thrombotic complications of patients admitted to intensive care with COVID-19 at a teaching hospital in the United Kingdom. *Thromb Res.* 2020;191:76-77.
12. Poissy J, Goutay J, Caplan M, et al. Pulmonary Embolism in Patients With COVID-19: Awareness of an Increased Prevalence. *Circulation.* 2020;142(2):184-186.
13. Hippensteel JA, Burnham EL, Jolley SE. Prevalence of venous thromboembolism in critically ill patients with COVID-19 [published online ahead of print, 2020 Jun 2]. *Br J Haematol.* 2020.
14. Desborough MJR, Doyle AJ, Griffiths A, Retter A, Breen KA, Hunt BJ. Image-proven thromboembolism in patients with severe COVID-19 in a tertiary critical care unit in the United Kingdom [published online ahead of print, 2020 May 29]. *Thromb Res.* 2020;193:1-4.
15. Demelo-Rodríguez P, Cervilla-Muñoz E, Ordieres-Ortega L, et al. Incidence of asymptomatic deep vein thrombosis in patients with COVID-19 pneumonia and elevated D-dimer levels. *Thromb Res.* 2020;192:23-26.
16. Mei F, Fan J, Yuan J, et al. Comparison of Venous Thromboembolism Risks Between COVID-19 Pneumonia and Community-Acquired Pneumonia Patients [published online ahead of print, 2020 Jul 6]. *Arterioscler Thromb Vasc Biol.* 2020;ATVBAHA120314779.



17. Llitjos JF, Leclerc M, Chochois C, et al. High incidence of venous thromboembolic events in anticoagulated severe COVID-19 patients. *J Thromb Haemost.* 2020;18(7):1743-1746.
18. Lodigiani C, Iapichino G, Carenzo L, et al. Venous and arterial thromboembolic complications in COVID-19 patients admitted to an academic hospital in Milan, Italy. *Thromb Res.* 2020;191:9-14.
19. Santoliquido A, Porfidia A, Nesci A, et al. Incidence of Deep Vein Thrombosis among non-ICU Patients Hospitalized for COVID-19 Despite Pharmacological Thromboprophylaxis [published online ahead of print, 2020 Jul 6]. *J Thromb Haemost.* 2020.
20. Trigonis RA, Holt DB, Yuan R, et al. Incidence of Venous Thromboembolism in Critically Ill Coronavirus Disease 2019 Patients Receiving Prophylactic Anticoagulation [published online ahead of print, 2020 Jun 26]. *Crit Care Med.* 2020.
21. Bilaloglu S, Aphinyanaphongs Y, Jones S, Iturrate E, Hochman J, Berger JS. Thrombosis in Hospitalized Patients With COVID-19 in a New York City Health System [published online ahead of print, 2020 Jul 20]. *JAMA.* 2020:e2013372.
22. Piazza G, Fanikos J, Zayaruzny M, Goldhaber SZ. Venous thromboembolic events in hospitalised medical patients. *Thromb Haemost.* 2009;102(3):505-510.
23. Lim W, Meade M, Lauzier F, et al. Failure of anticoagulant thromboprophylaxis: risk factors in medical-surgical critically ill patients\*. *Crit Care Med.* 2015;43(2):401-410.

Figure 1: Forest plot showing pooled estimate of venous thromboembolism (Upper), pulmonary embolism (Middle) and deep venous thrombosis (Lower)

A. Venous Thromboembolism

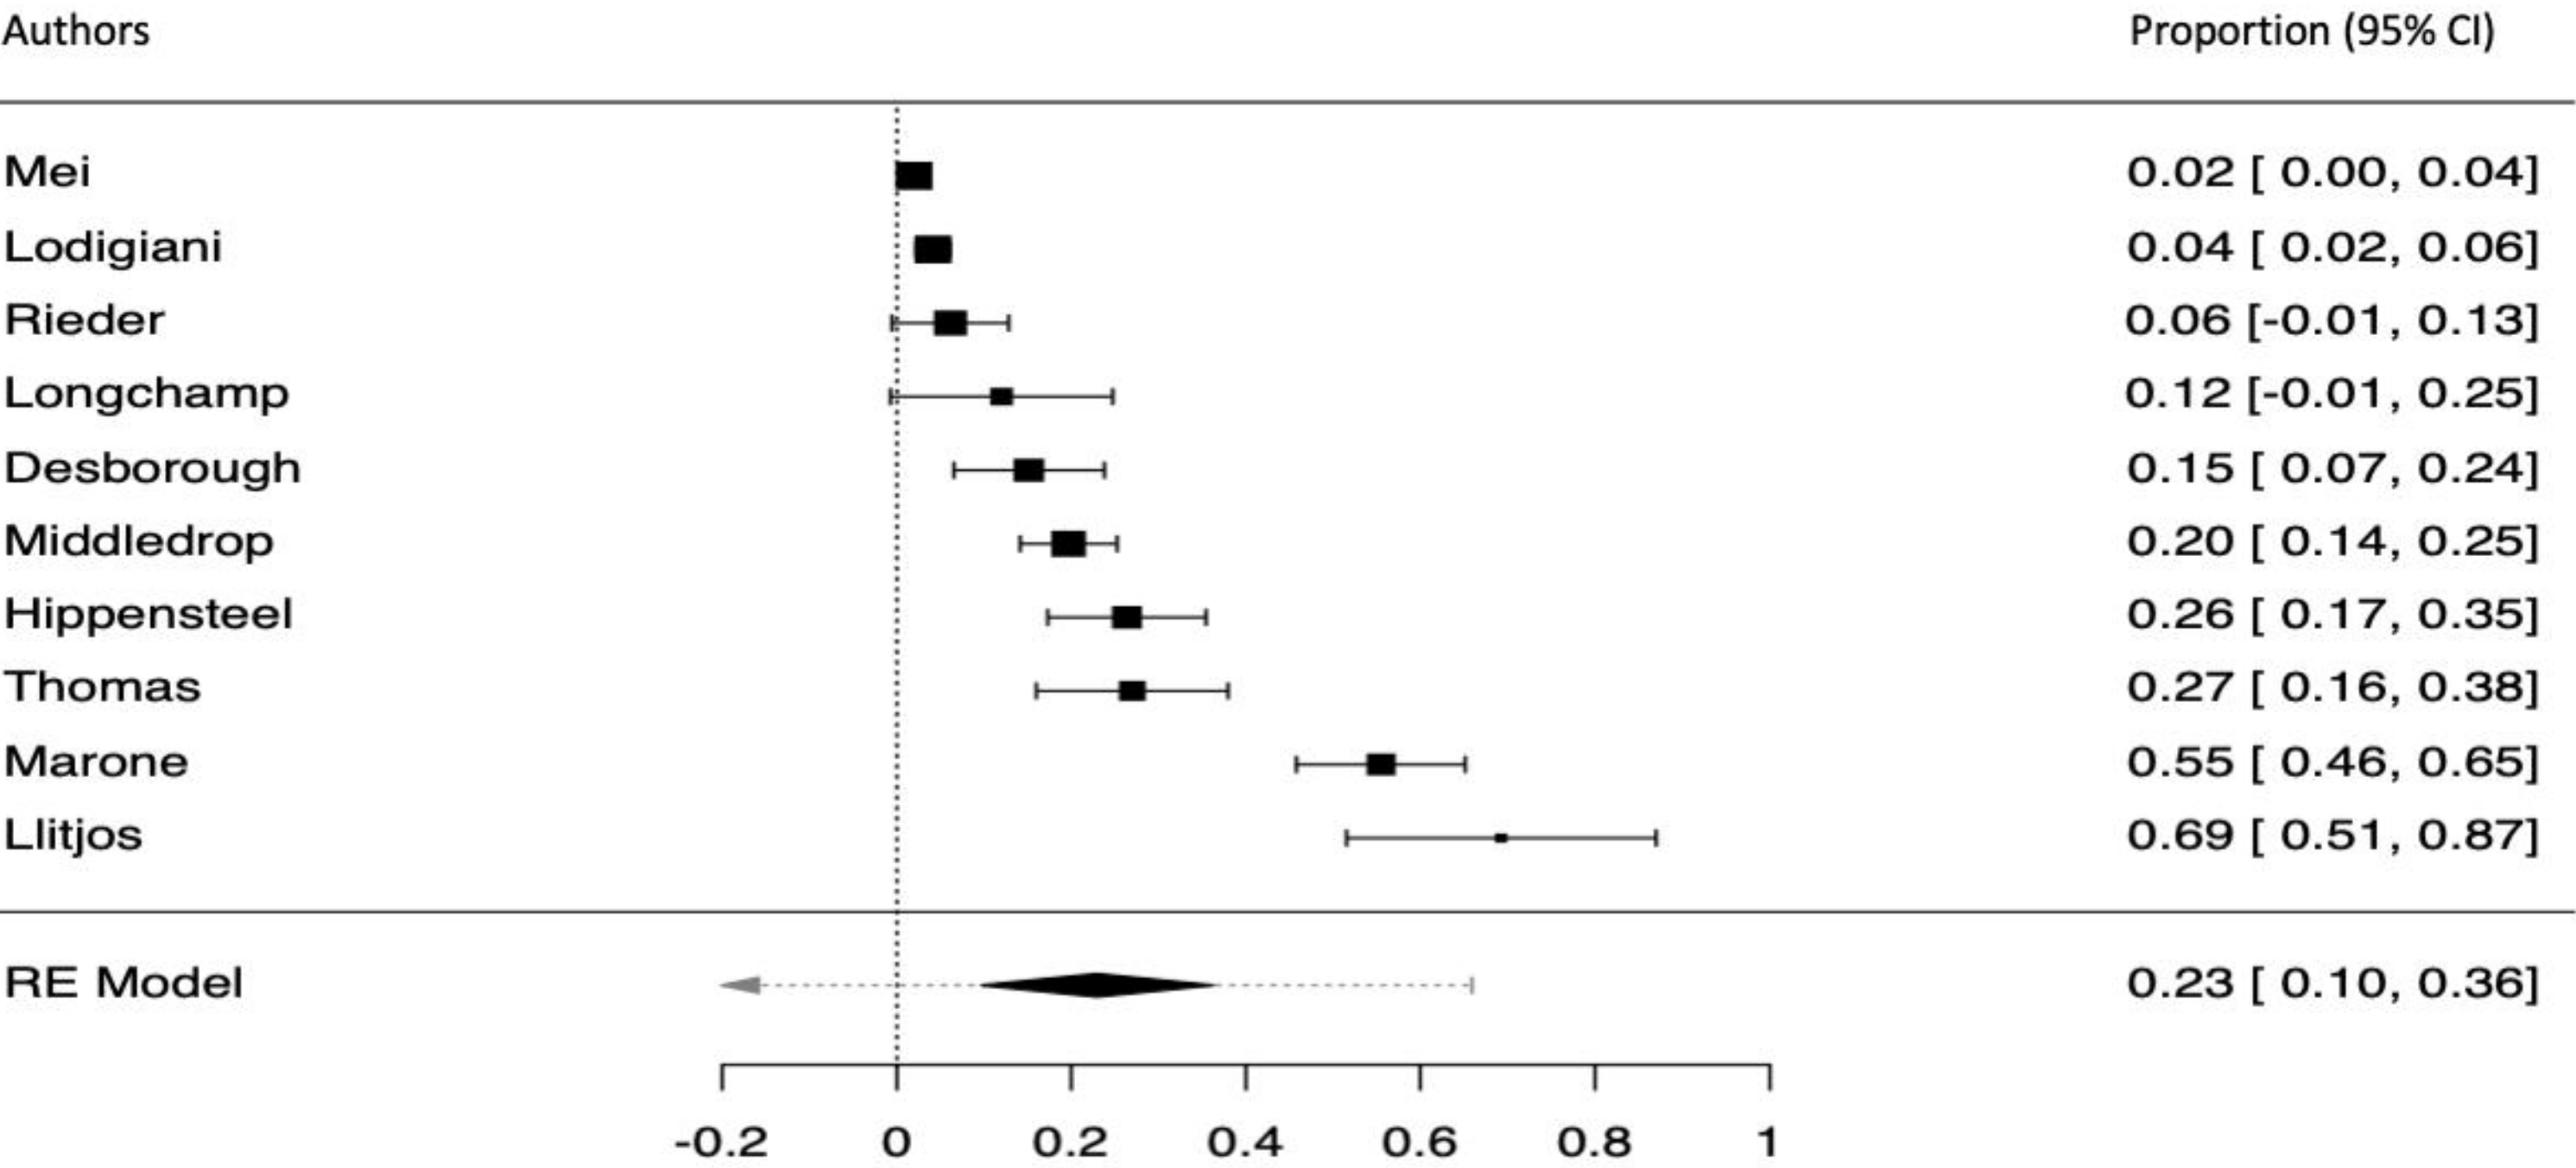

B. Pulmonary Embolism

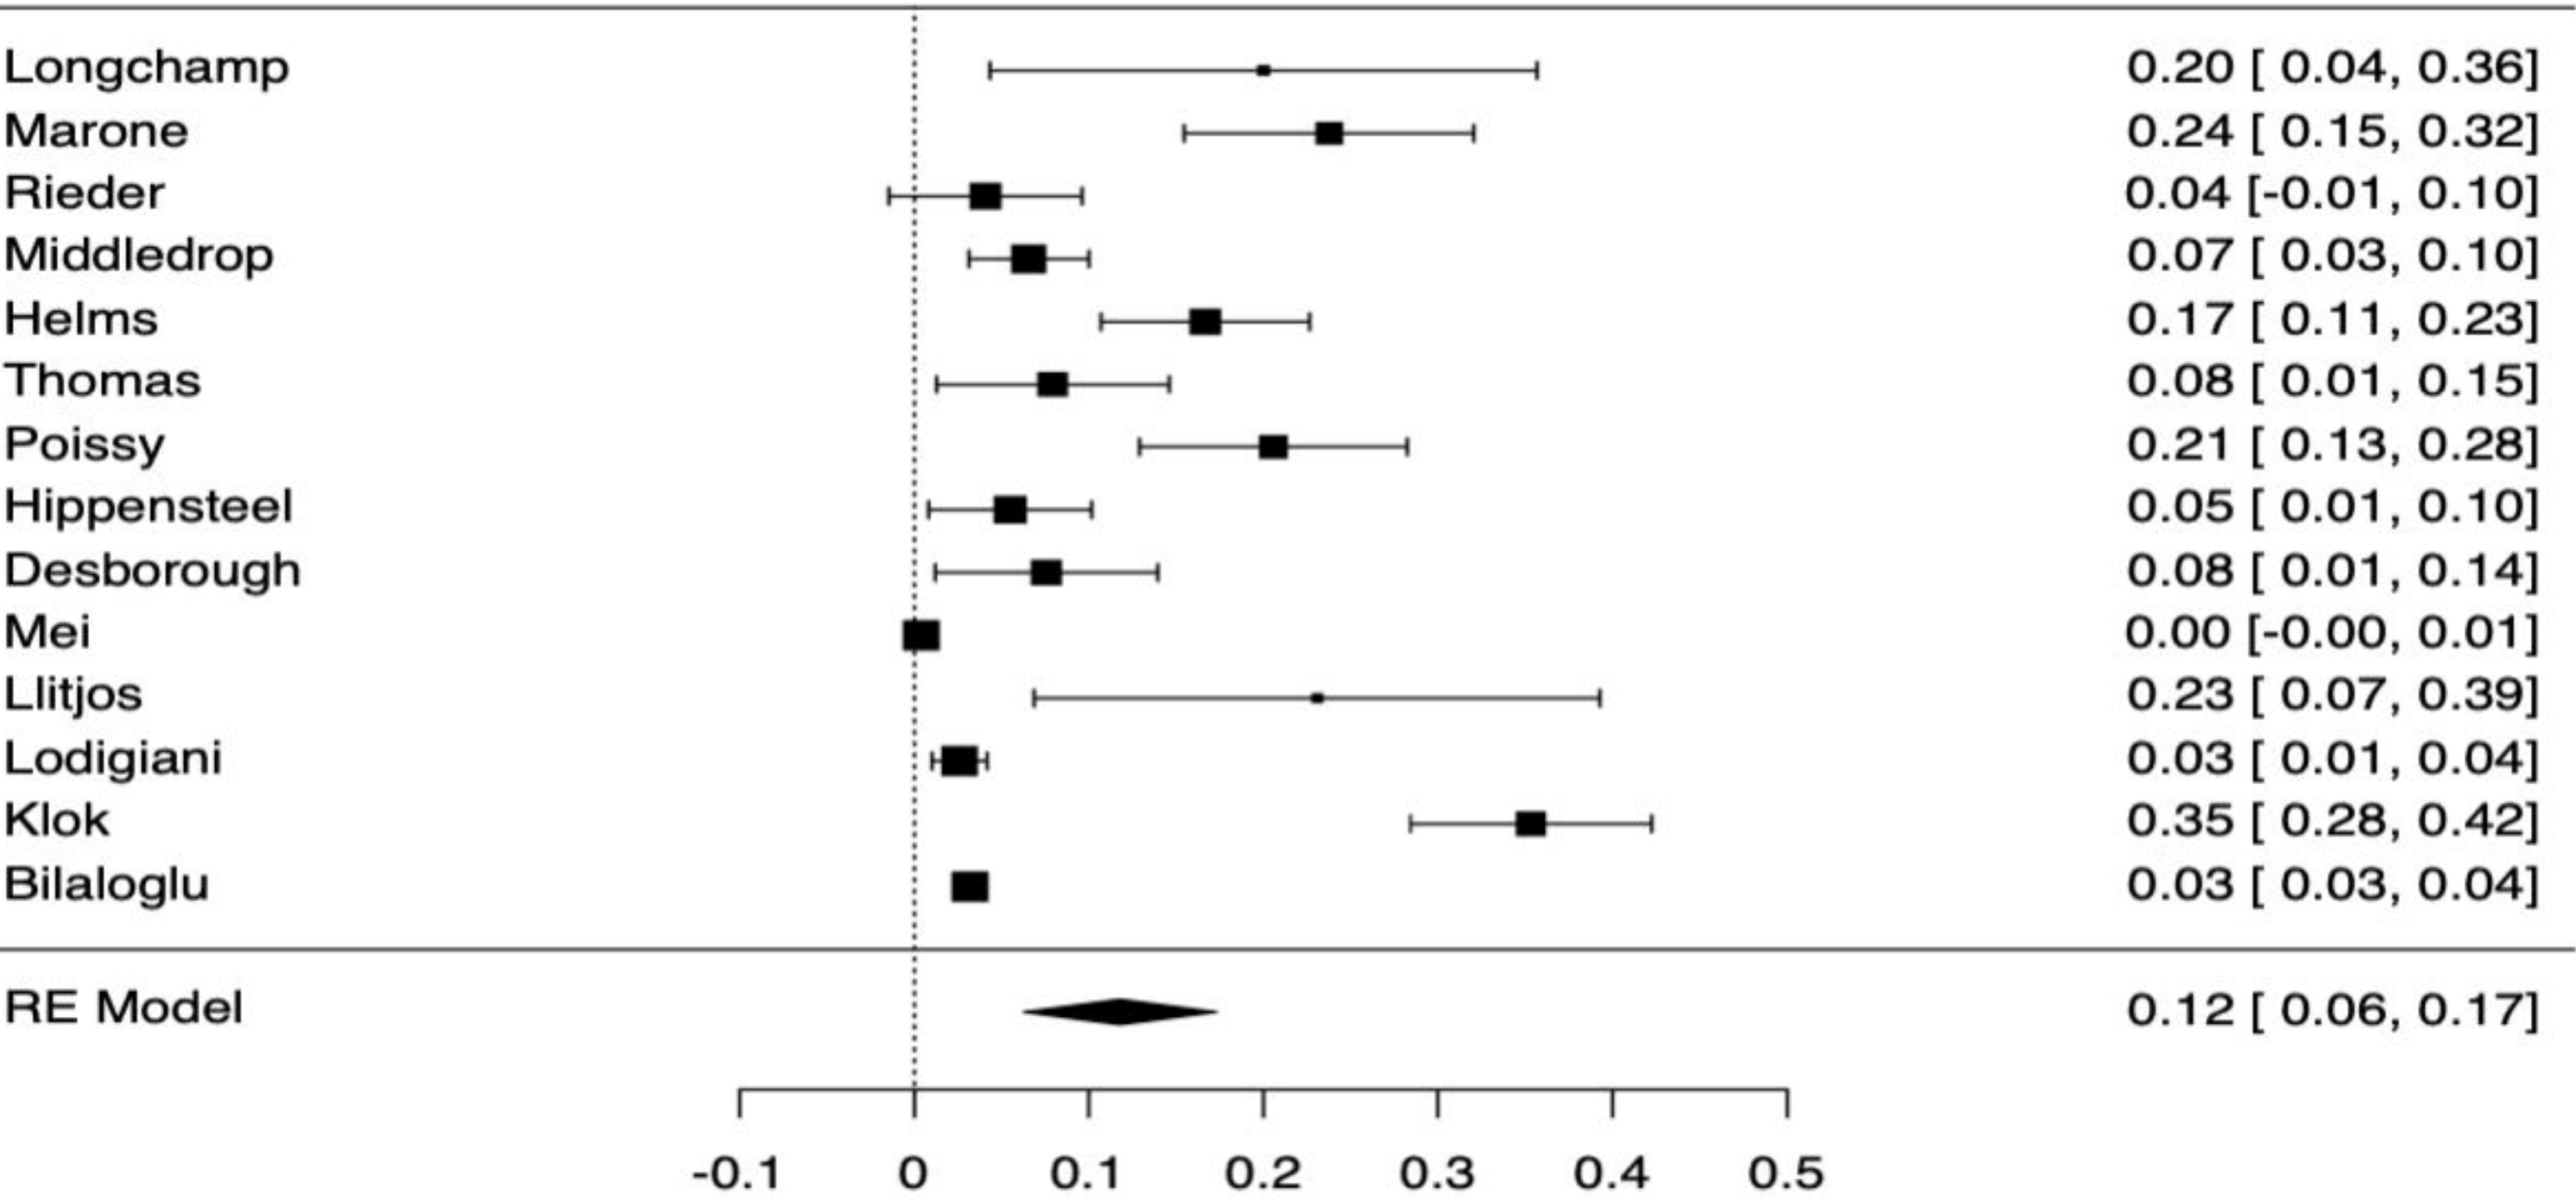

C. Deep Venous Thrombosis

medRxiv preprint doi: <https://doi.org/10.1101/2020.09.23.20190423>; this version posted September 23, 2020. The copyright holder for this preprint (which was not certified by peer review) is the author/funder, who has granted medRxiv a license to display the preprint in perpetuity. It is made available under a CC-BY-NC-ND 4.0 International license.

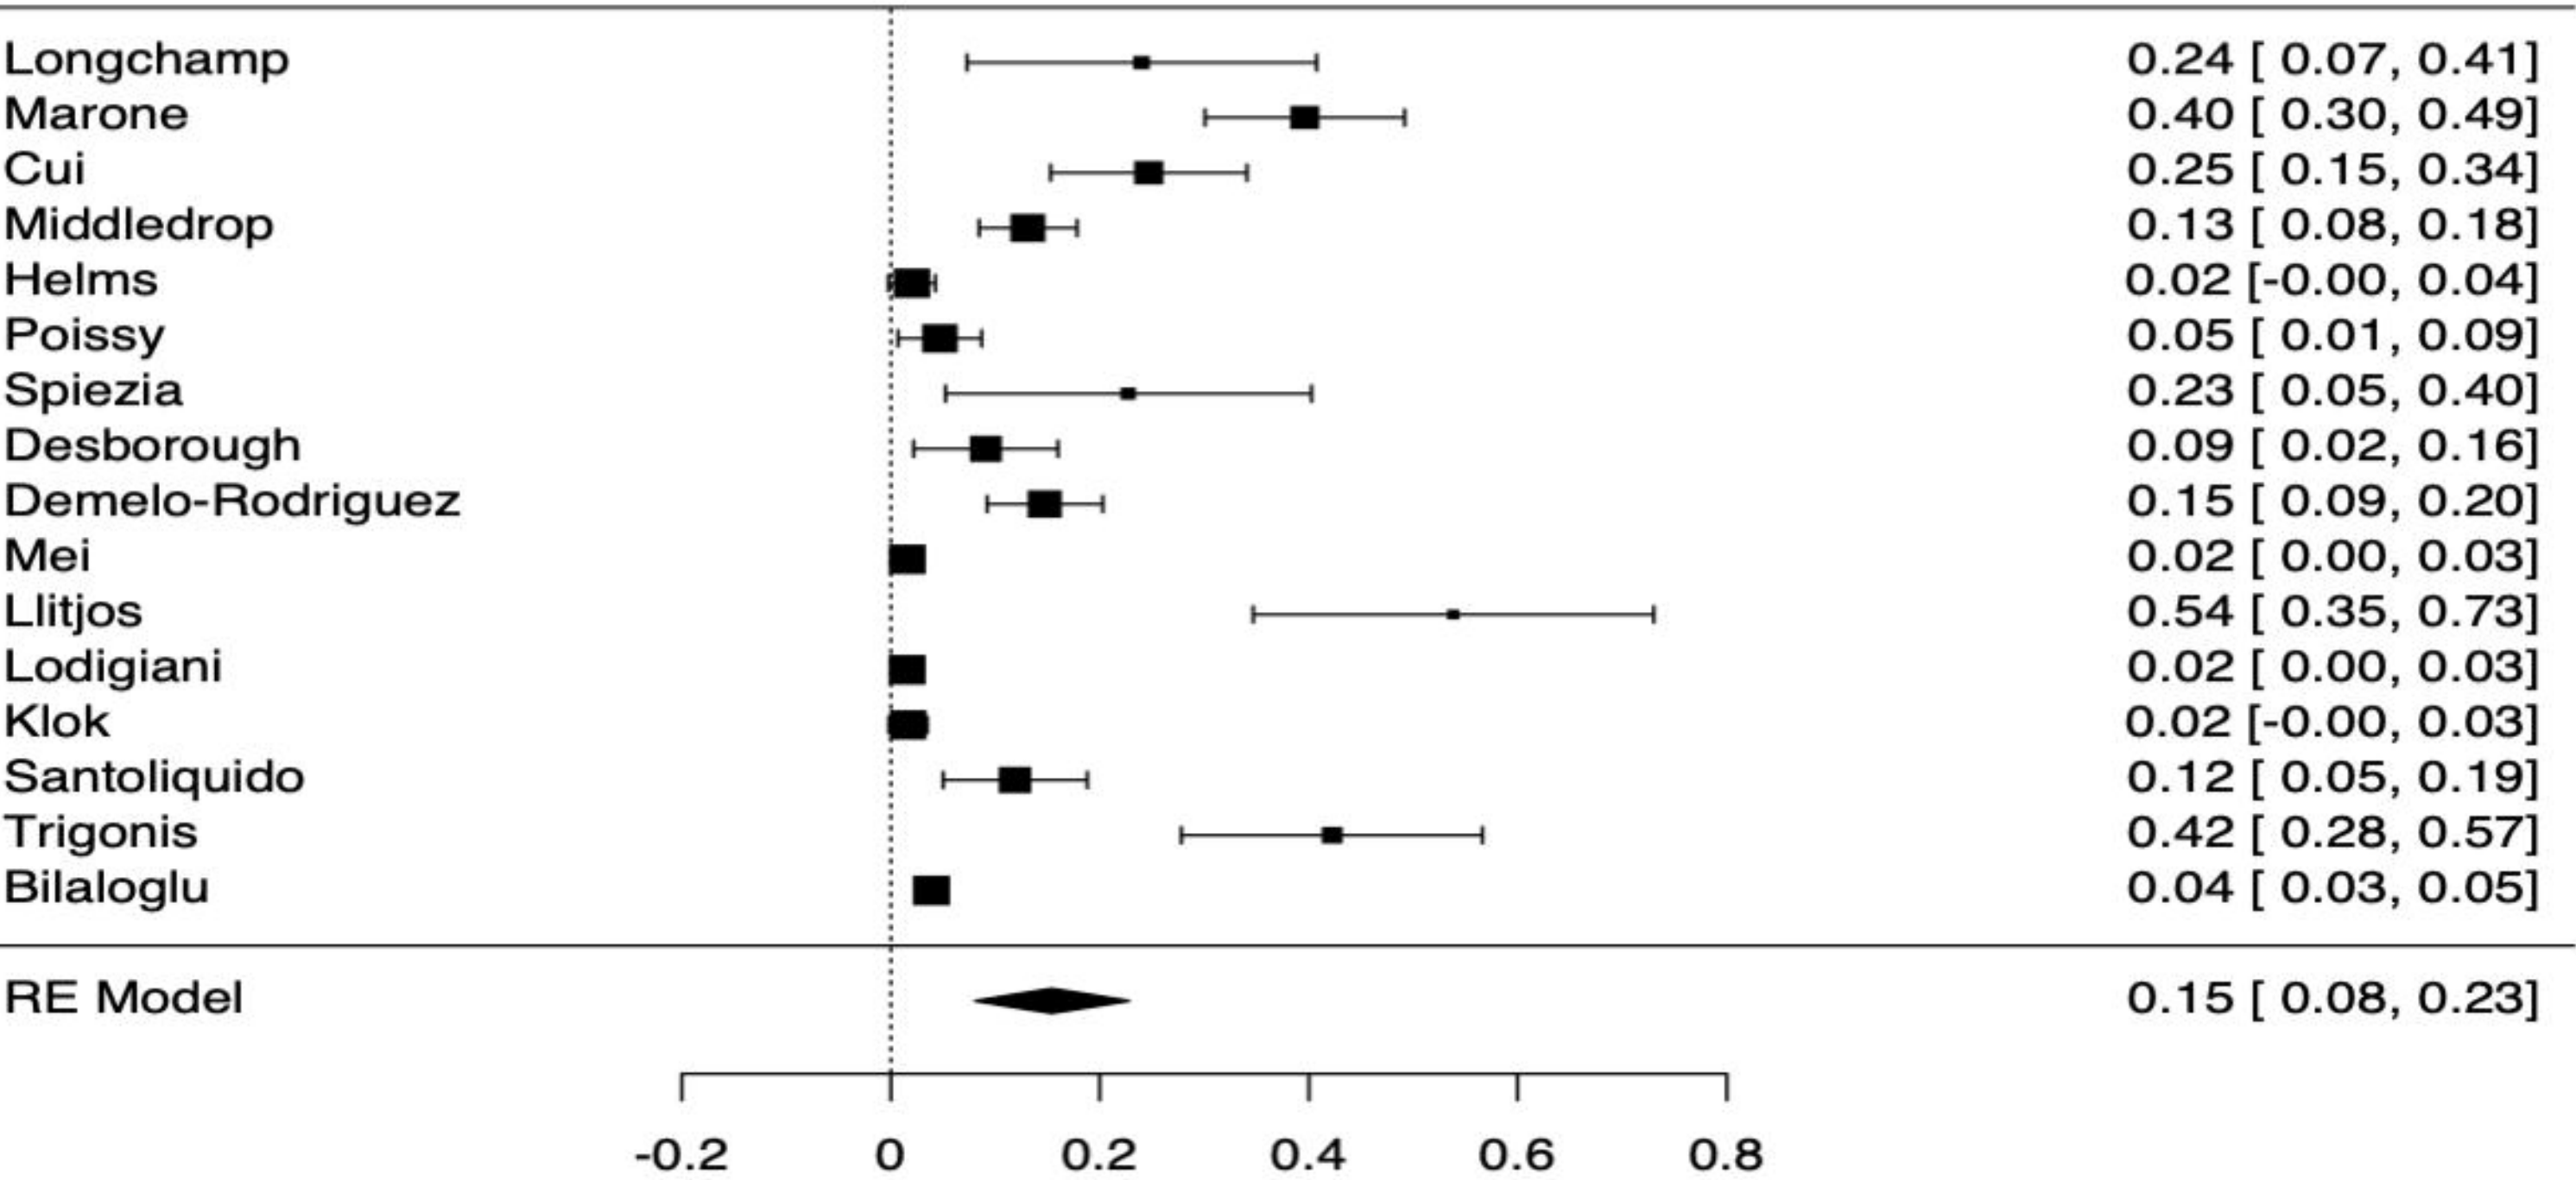

Source: http://medrxiv.org/cgi/reprint/2020.08.28.20184028v1
